# Supplementary material
Source: publisher figshare collection journal article supplement (https://asha.figshare.com/articles/dataset/_/14963817)

**Supplemental Figure 4.** Average event-related potentials (ERPs) for Participant 4 with a history of traumatic brain injury (TBI) elicited by words that were grammatically incorrect (red line) or correct (black line) with respect to the rest of the sentence. ERPs are shown for each electrode examined (see Figure 1 in article). Note that positive polarity is up. The topographic maps in the lower portion display the scalp distribution of the P600 component. \*Channel marked bad due to noise and not used in analyses.

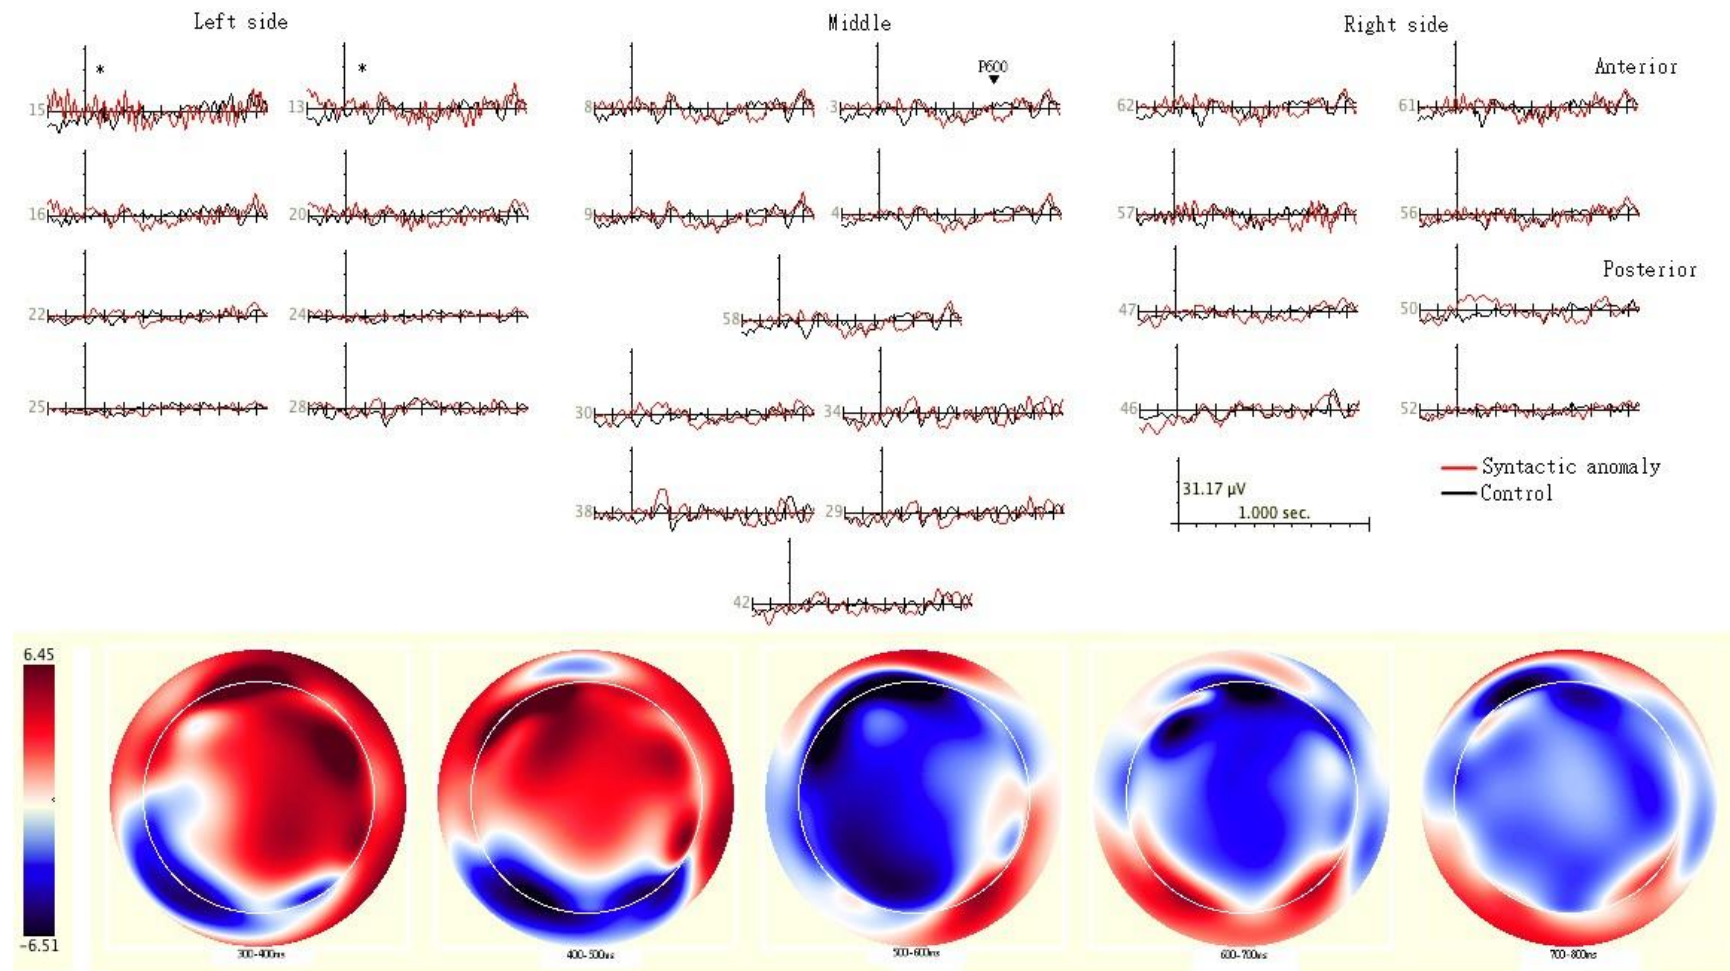

Supplement: Supplementary file 3 [file 1]
